# Supplementary material for: Nocturnal plant respiration is under strong non-temperature control
Source: PubMed Central journal article supplement (PMC9512894; doi:10.1038/s41467-022-33370-1), 2022-09-26
Supplement: 41467_2022_33370_MOESM1_ESM.pdf [file 41467_2022_33370_MOESM1_ESM.pdf]

# 1 Supplementary Information

## 2 Supplementary Figure 1a

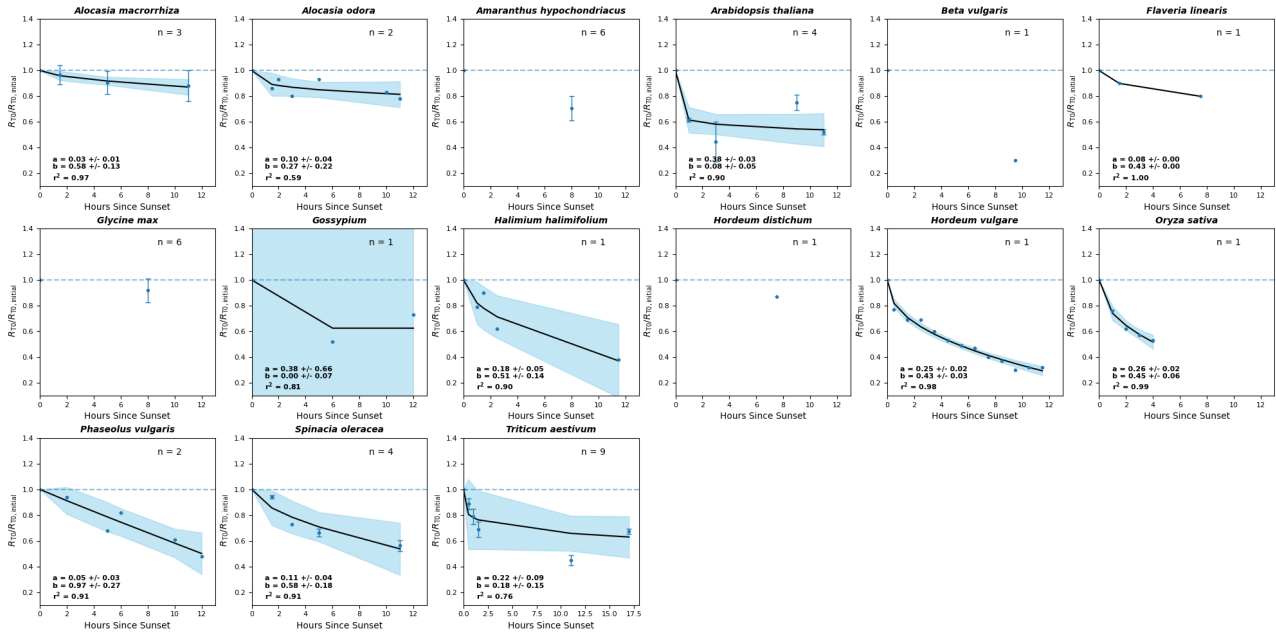

3

4

5

6

7 **Supplementary Figure 1b**

8

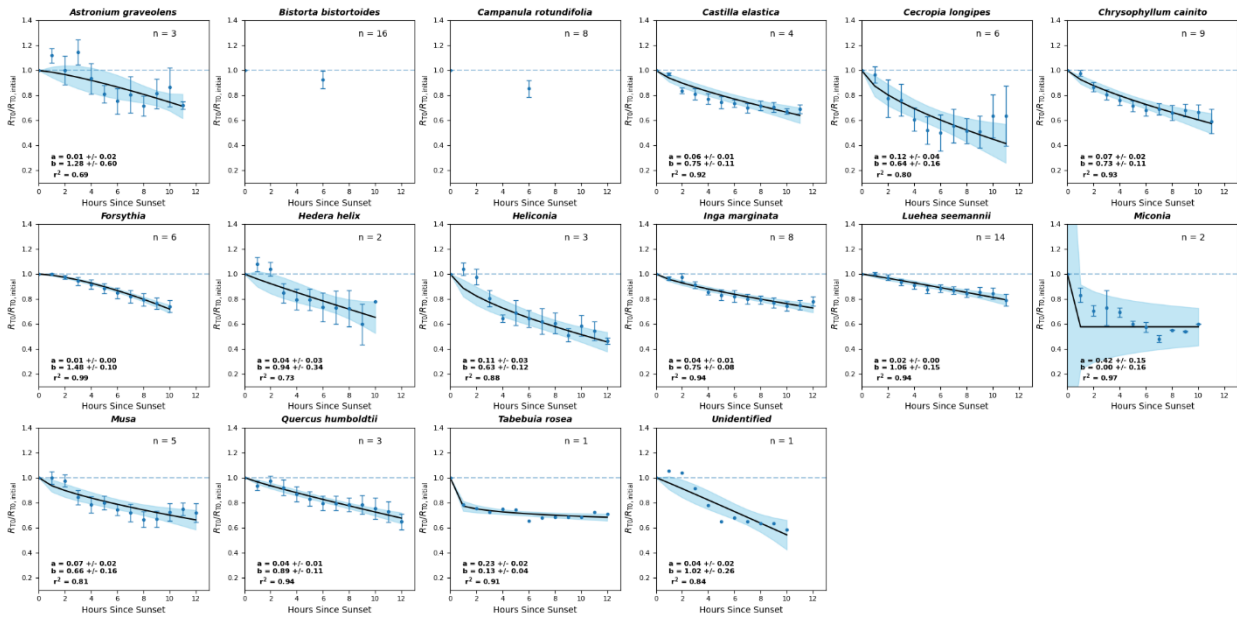

9

10 **Supplementary Figure 1. (a, lab; b, field)** Development of  $R_{T0}/R_{T0-initial}$  (mean  $\pm$  SEM) through the  
 11 night from onset of darkness/sunset in individual species (Supplementary Table 1). Also shown are  
 12 the 95%-confidence intervals in blue, estimates of the coefficients (including 1SD) of the power-  
 13 functions ( $y = 1 - a \cdot \text{hour}^b$ ), and the coefficient of determination ( $r^2$ ). n denotes number of replicate  
 14 plants per species. The results did not vary significantly (t-test) between biomes ( $t = -1.116$ ,  $df =$   
 15  $19.614$ ,  $p\text{-value} = 0.2779$ ), experimental conditions ( $t = 1.0819$ ,  $df = 21.025$ ,  $p\text{-value} = 0.2915$ ), or  
 16 plant type ( $t = -1.3837$ ,  $df = 27.219$ ,  $p\text{-value} = 0.1777$ ), allowing the entire dataset to be collated and  
 17 a single universal equation to be derived for modelling, representative of all groups (Fig. 1a). Data  
 18 are available in Supplementary Data 1.

19 **Supplementary Figure 2a**

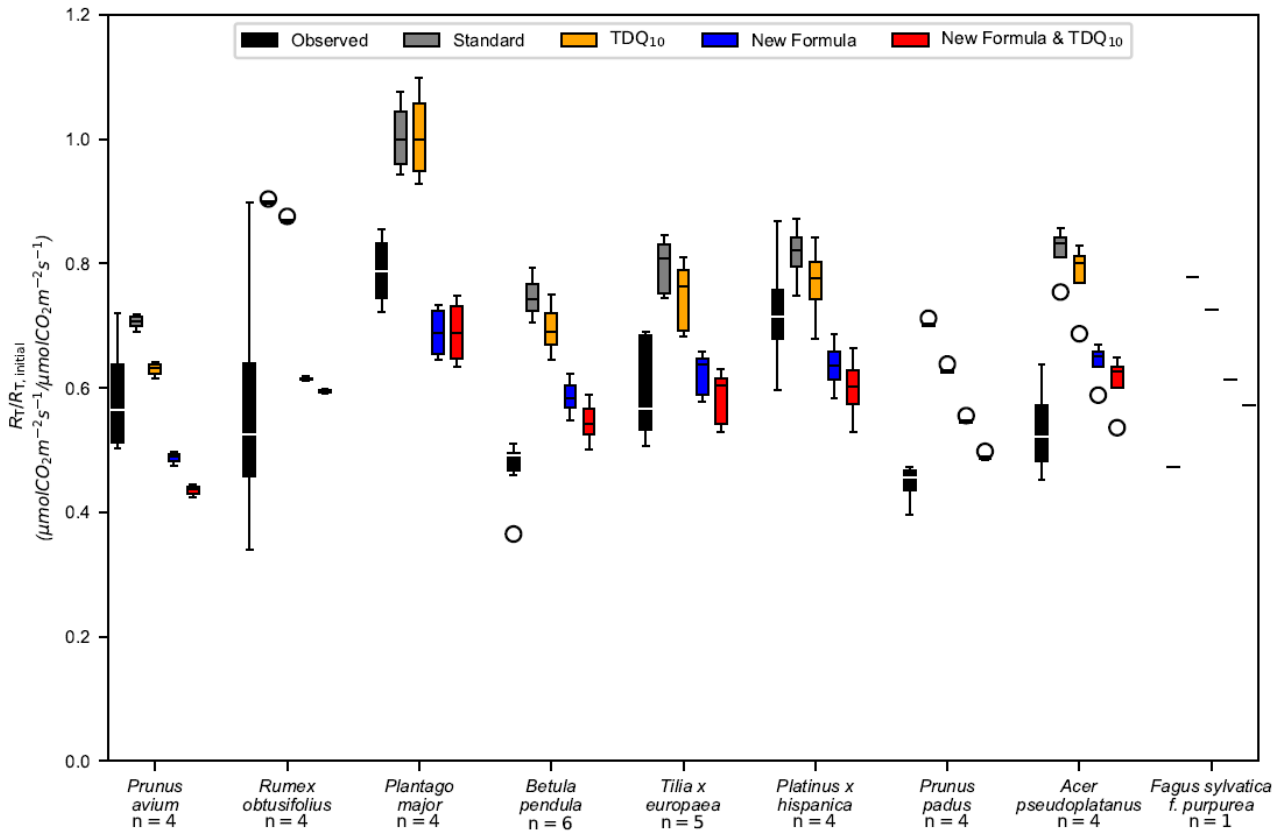

20

21

22 **Supplementary Figure 2b**

23

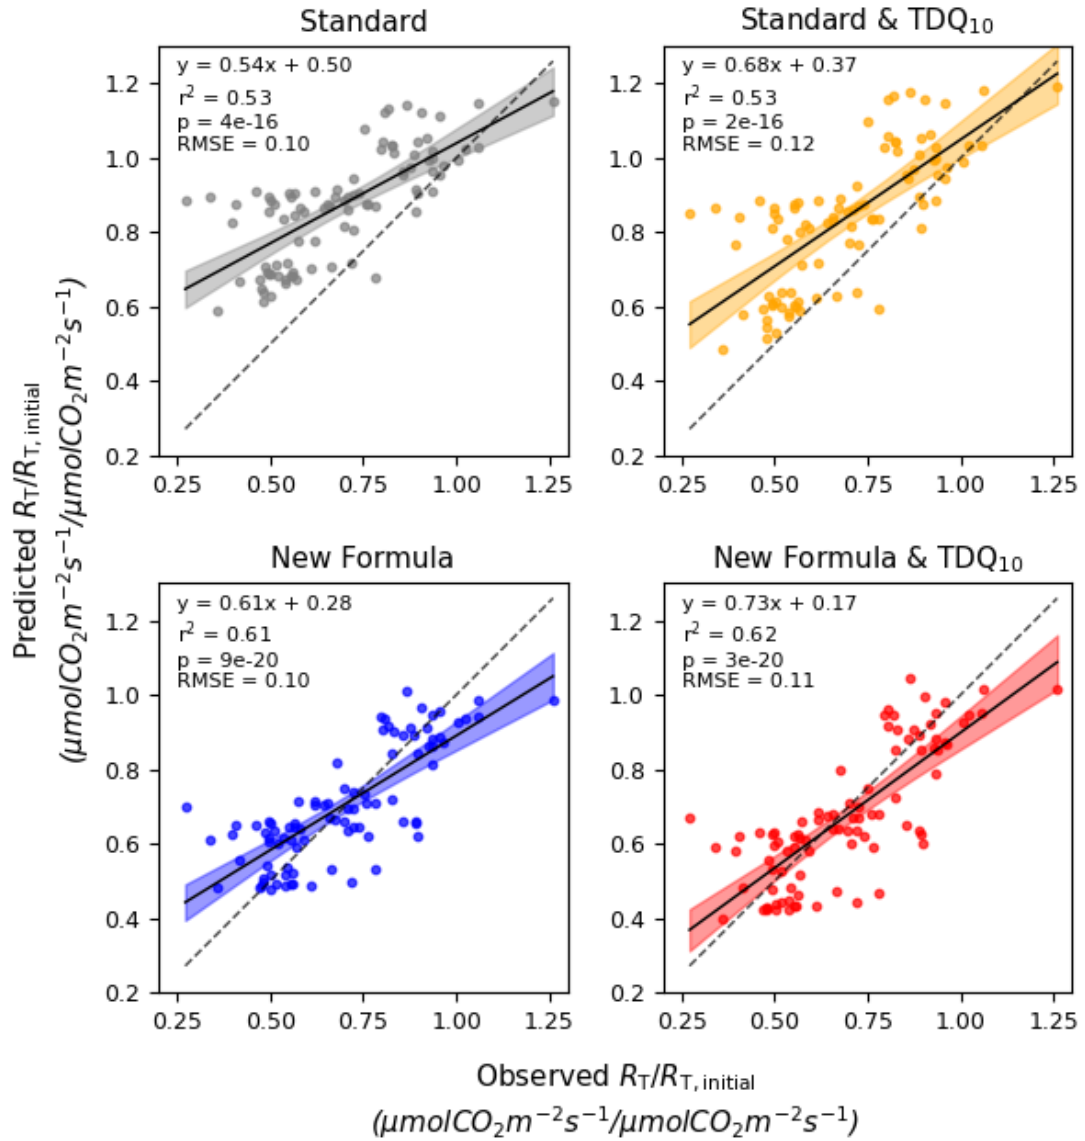

24

25

26

27 **Supplementary Figure 2c**

28

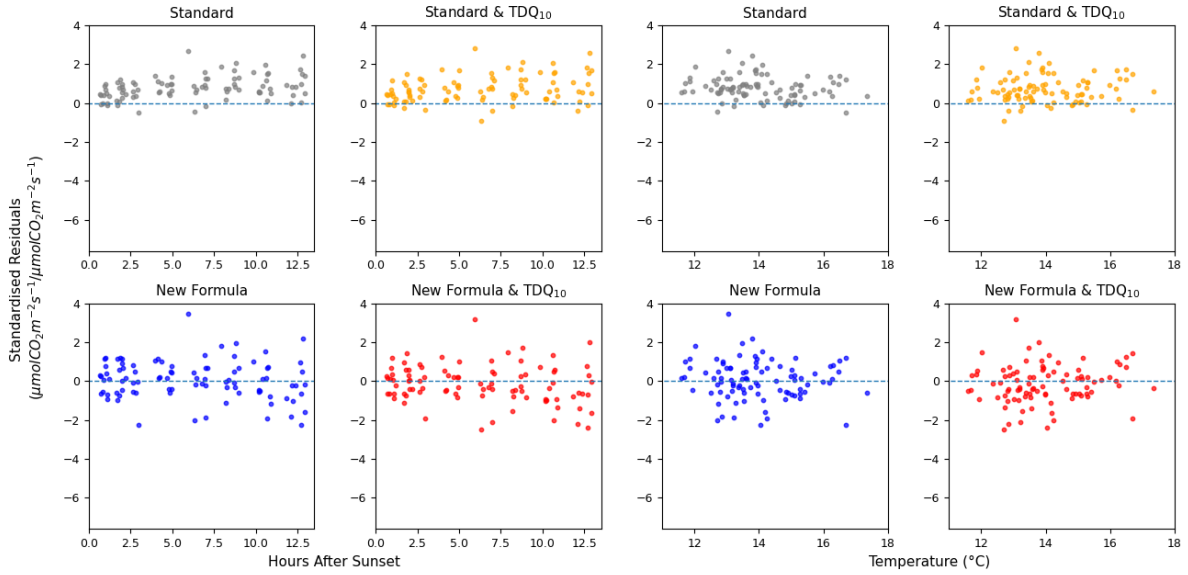

29

30 **Supplementary Figure 2d**

31

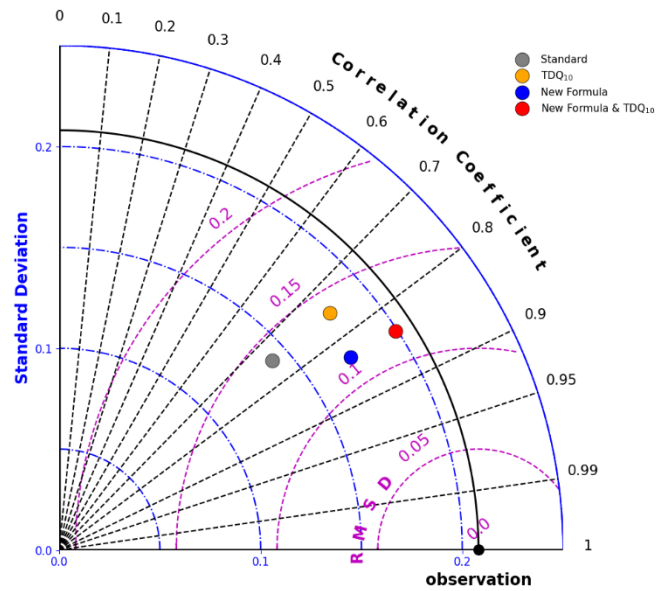

32

33

34 **Supplementary Figure 2. A)** Observed and modelled  $R_{T_o}/R_{T_o\text{-initial}}$  in nine field-grown broad leaf  
35 species (Fig. 2c, Supplementary Table 3) at 13h after sunset. Modelled values are Standard (Equation  
36 1 &  $Q_{10} = 2$ ), Standard modified (Equation 1 & TDQ<sub>10</sub>), New formulation (Equation 4 &  $Q_{10} = 2$ ),  
37 and New formulation modified (Equation 4 & TDQ<sub>10</sub>). **B)** Box-and-whisker-plots (The centre line is  
38 the median. The lower whisker is the lowest datum above the first quartile - 1.5\*interquartile range.  
39 The upper whisker is the highest datum below the first quartile - 1.5\*interquartile range. Any points  
40 outside the whiskers are plotted separately) of observed- and modelled leaf  $R_{T_o}/R_{T_o\text{-initial}}$  during  
41 nights for three species (Fig. 2c, n = 4 per species). **C)** Standardised residuals of the four simulations  
42 (S1-S4, Supplementary Table 4) over time after sunset and over air temperature. The residuals appear  
43 more symmetrically distributed for the models that include the new term including time of night. **D)**  
44 Model evaluation with a Taylor Diagram showing the models that include TDQ<sub>10</sub> and  $Q_{10} = 2$  and the  
45 new formula having better performance (highest correlation coefficient, closest standard deviation to  
46 observed and lowest RMSD) than models without the new formula. Data are available in  
47 Supplementary Data 2-3.

48

49

50

51 **Supplementary Figure 3a**

52

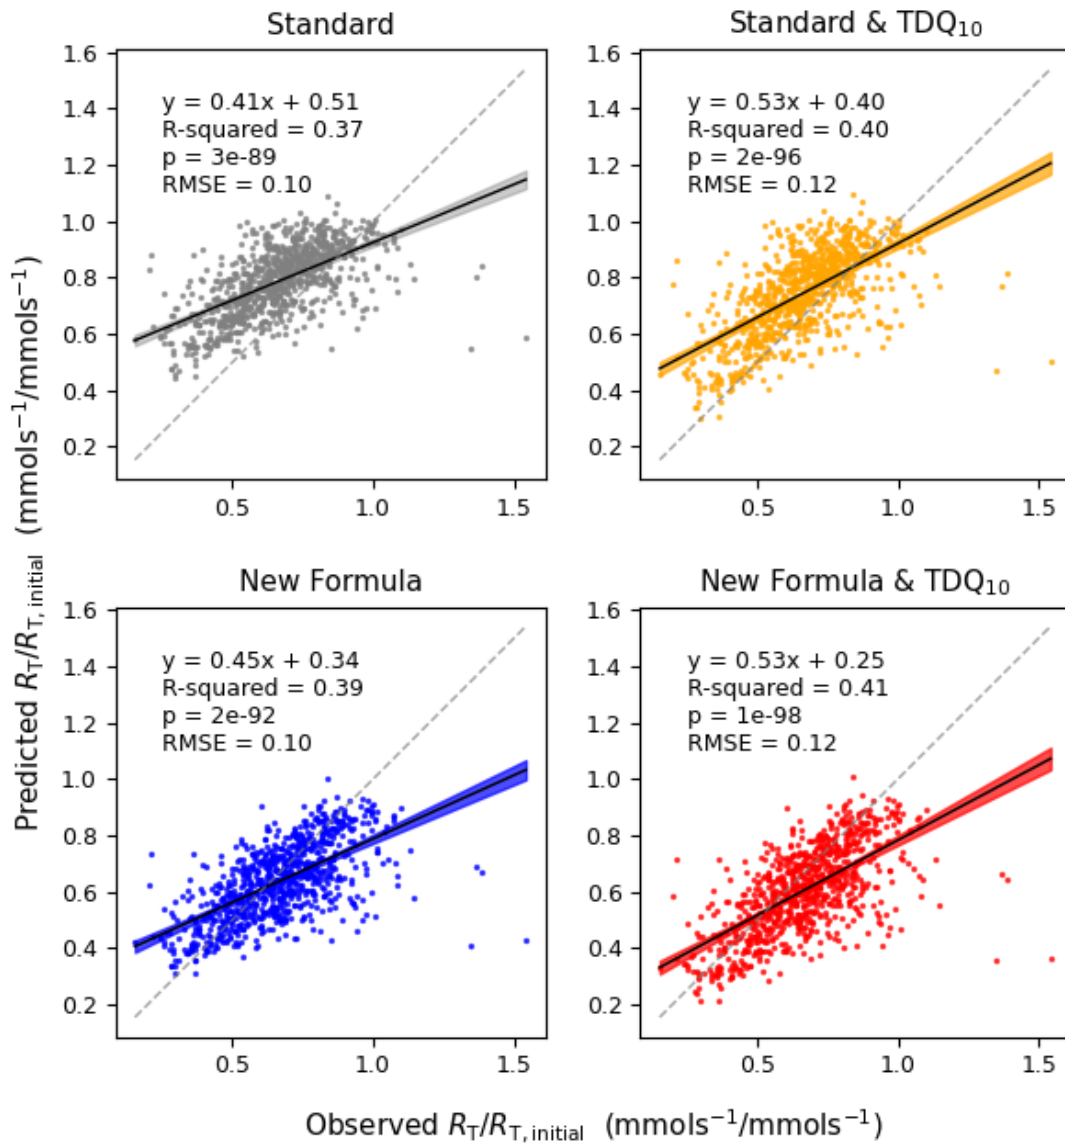

53

54

55

56

57

58 **Supplementary Figure 3b**

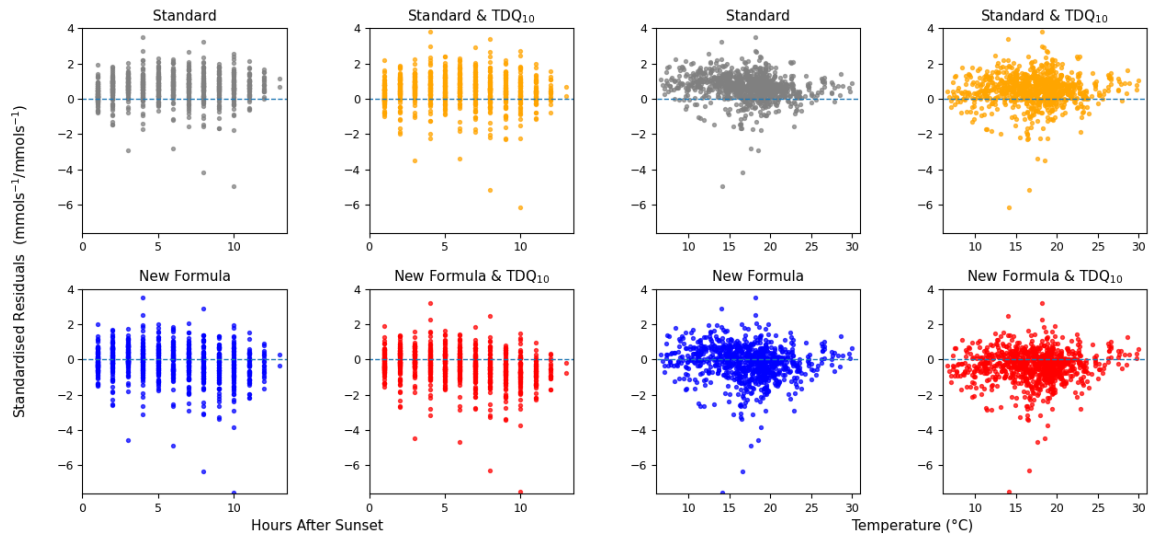

59

60

61

62

63

64

65

66

67

68

69

70

71

72

73



74 **Supplementary Figure 3c**

75

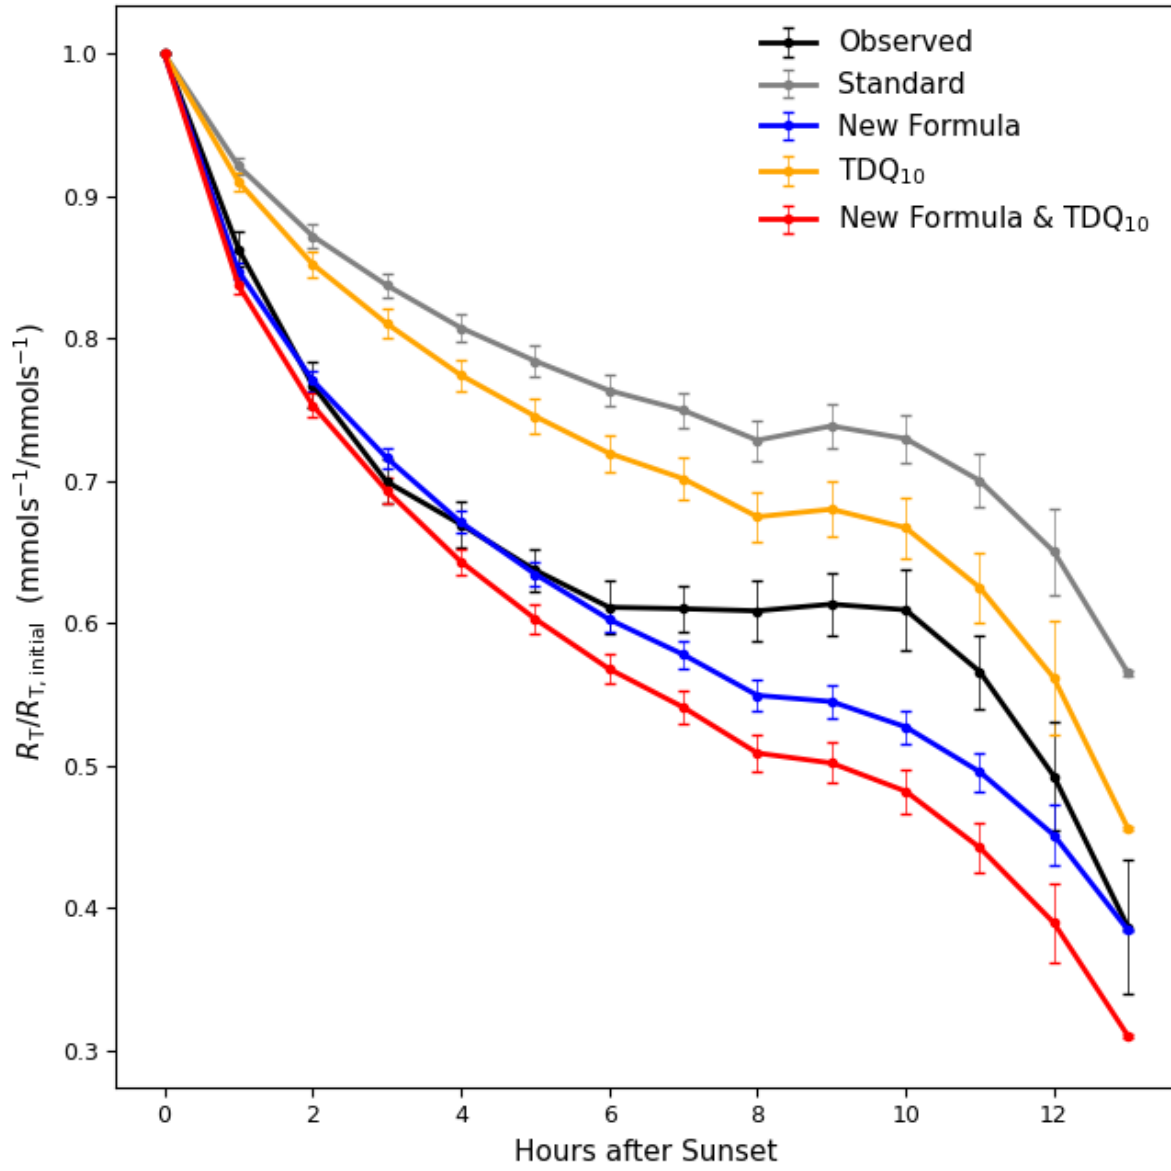

76

77

78

79

80

81 **Supplementary Figure 3d**

82

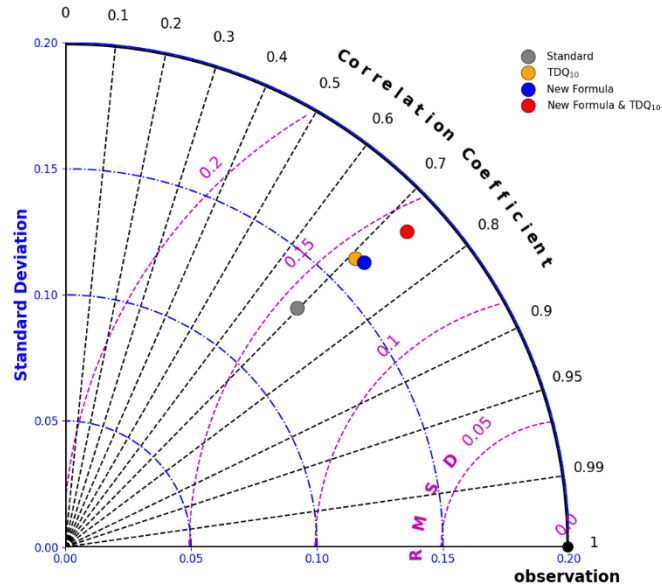

83

84 **Supplementary Figure 3.** Evaluation of Equation 4 using tree stand (*Eucalyptus tereticornis*) level  
 85 measured- and modelled (S1-S4, Supplementary Table 4) values of  $R_{T_o}/R_{T_o\text{-initial}}$ . **A)** Predicted  
 86  $R_{T_o}/R_{T_o\text{-initial}}$  as a function of measured  $R_{T_o}/R_{T_o\text{-initial}}$  (replicate chambers = 3, number of nights = 62,  
 87 period = 8- 13 hours), Root Mean Square Error (RMSE) are also given. **B)** Standardised residuals of  
 88 the four simulations (S1-S4, Supplementary Table 4) over time after sunset and over air temperature.  
 89 The residuals appear more symmetrically distributed for the models that include the new term  
 90 including time of night. **C)** Measured- and modelled (S1-S4, Supplementary Table 4) values of  
 91  $R_{T_o}/R_{T_o\text{-initial}}$  (replicate chambers = 3, number of nights = 62) plotted as function of time of night  
 92 (means  $\pm$  1SD). **D)** Model evaluation with a Taylor Diagram showing the models that include TDQ<sub>10</sub>  
 93 and Q<sub>10</sub> = 2 and the new formula having better performance (highest correlation coefficient, closest  
 94 standard deviation to observed and lowest RMSD) than models without the new formula. Data are  
 95 available in Supplementary Data 5.

96

97 **Supplementary Figure 4**

98

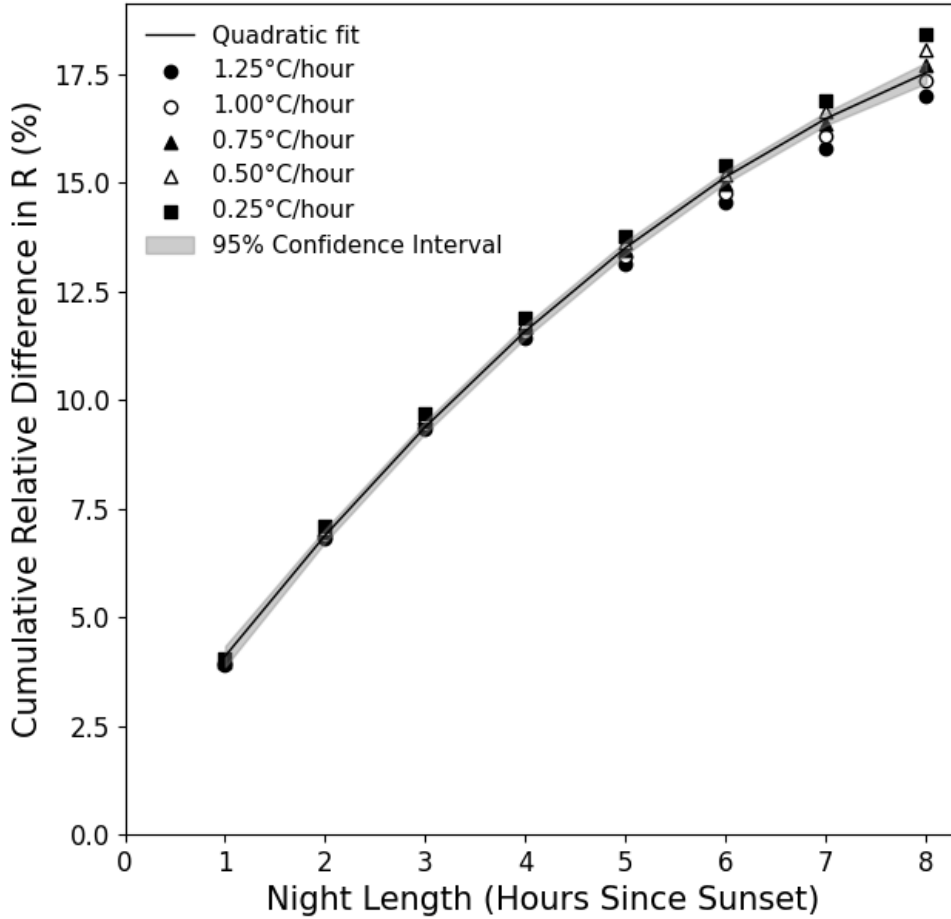

99

100

101 **Supplementary Figure 4.** Cumulated overestimation of  $R_T$  as function of length of night ( $y = 1.0 +$

102  $3.2X - 0.14X^2$ , quadratic fit,  $R^2 = 0.995$ , intercept  $p = 6.45E-06$ ,  $X$   $p = 9.71E-29$ ,  $X^2$   $p = 9.58E-16$ )

103 using Equation 1 instead of Equation 3 (mean response of five different rates of cooling at night).

104 Data are available in Supplementary Data 6.

105

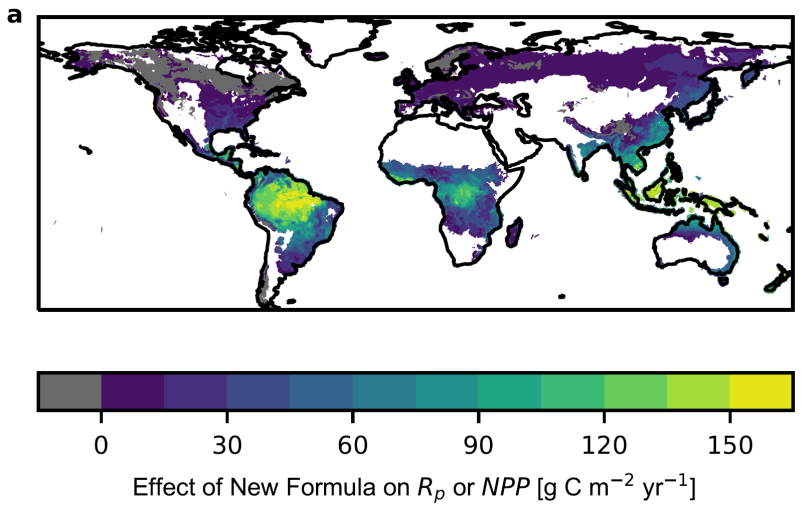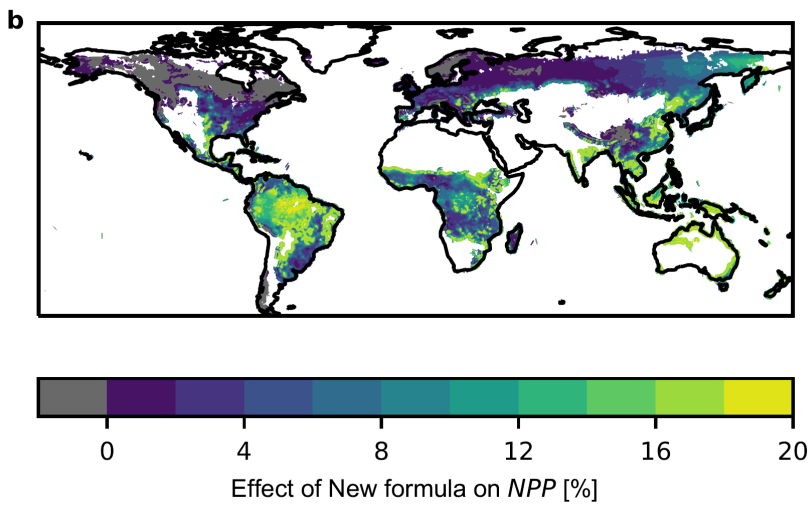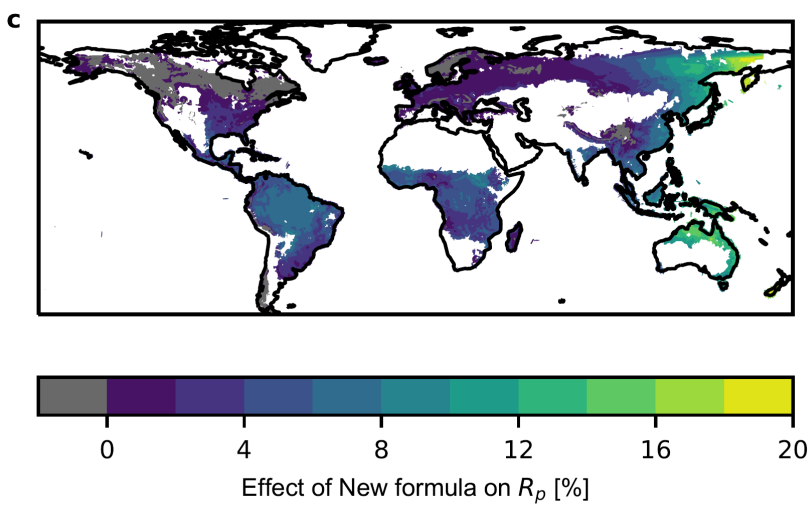

108 **Supplementary Figure 5.** Impact of incorporation of nocturnal variation in whole plant  $R_{T_0}$  in  
109 simulated reduction in plant respiration  $R_p$  (**A**, **C**) and corresponding increase in NPP (**B**) over the  
110 period 2000-2018 using TDQ<sub>10</sub> (eqn 2) and the new formula (eqn 5). Impact is estimated as the  
111 difference between the temporal mean of simulations with and without nocturnal variation in whole  
112 plant  $R_{T_0}$  for *NPP* and vice versa for  $R_p$  (**A**) and as a percentage respect to simulations without  
113 nocturnal variation in  $R_{T_0}$  (**B**, **C**). Note, the reduction in  $R_p$  (**A**) is identical to the increase in NPP in absolute  
114 terms. Results are presented for grid cells where grid level *NPP* is  $>50 \text{ g m}^{-2} \text{ yr}^{-1}$  in the standard  
115 TDQ<sub>10</sub> simulations to avoid excessively large % effects at very low *NPP*.

116

117 **Supplementary Table 1.** Meta data underlying Figure 1a. Replicates within species indicate from  
 118 published studies number of different values across different conditions that are possible to extract  
 119 from the total number references for a species. Each value is typically based on several true replicates,  
 120 a number that is not always possible to extract from the published studies.

| Species                           | Biome     | Plant functional type | Experimental conditions | Woody or non-woody | Replicate | Reference                                                |
|-----------------------------------|-----------|-----------------------|-------------------------|--------------------|-----------|----------------------------------------------------------|
| <i>Alocasia macrorrhiza</i>       | Tropical  | Herbaceous            | Lab                     | non-woody          | 3         | Noguchi <i>et al.</i> 1996<br>Noguchi & Terashima 1997;  |
| <i>Alocasia odora</i>             | Tropical  | Herbaceous            | Lab                     | non-woody          | 2         | Noguchi <i>et al.</i> 2001                               |
| <i>Amaranthus hypochondriacus</i> | Tropical  | Herbaceous            | Lab                     | non-woody          | 6         | Bunce 2007                                               |
| <i>Arabidopsis thaliana</i>       | Temperate | Herbaceous            | Lab                     | non-woody          | 4         | Trethewey & ap Rees 1994;<br>Watanabe <i>et al.</i> 2014 |
| <i>Astronium graveolens</i>       | Tropical  | Tree                  | Field                   | woody              | 3         | This study                                               |
| <i>Beta vulgaris</i>              | Temperate | Herbaceous            | Lab                     | non-woody          | 1         | Fondy & Geiger 1982                                      |
| <i>Bistorta bistortoides</i>      | Temperate | Herbaceous            | Field                   | non-woody          | 16        | McCutchan & Monson 2001                                  |
| <i>Campanula rotundifolia</i>     | Temperate | Herbaceous            | Field                   | non-woody          | 8         | McCutchan & Monson 2001                                  |
| <i>Castilla elastica</i>          | Tropical  | Tree                  | Field                   | woody              | 4         | This study                                               |
| <i>Cecropia longipes</i>          | Tropical  | Tree                  | Field                   | woody              | 6         | This study                                               |
| <i>Chrysophyllum cainito</i>      | Tropical  | Tree                  | Field                   | woody              | 9         | This study                                               |

|                              |           |            |       |           |    |                                               |
|------------------------------|-----------|------------|-------|-----------|----|-----------------------------------------------|
| <i>Flaveria linearis</i>     | Tropical  | Herbaceous | Lab   | non-woody | 1  | Leonardos et al 2006                          |
| <i>Forsythia</i>             | Temperate | Shrub      | Field | woody     | 6  | This study                                    |
| <i>Glycine max</i>           | Tropical  | Herbaceous | Lab   | non-woody | 6  | Bunce 2007                                    |
| <i>Gossypium</i>             | Temperate | Shrub      | Lab   | woody     | 1  | Gessler et al. 2017                           |
| <i>Halimium halimifolium</i> | Temperate | Herbaceous | Lab   | non-woody | 1  | Lehmann et al. 2016                           |
| <i>Hedera helix</i>          | Temperate | Vine       | Field | woody     | 2  | This study                                    |
| <i>Heliconia</i>             | Tropical  | Herbaceous | Field | non-woody | 3  | This study                                    |
| <i>Hordeum distichum</i>     | Temperate | Herbaceous | Lab   | non-woody | 1  | Farrar & Farrar 1985                          |
| <i>Hordeum vulgare</i>       | Temperate | Herbaceous | Lab   | non-woody | 1  | Baysdorfer et al. 1987                        |
| <i>Inga marginata</i>        | Tropical  | Tree       | Field | woody     | 8  | This study                                    |
| <i>Luehea seemannii</i>      | Tropical  | Tree       | Field | woody     | 14 | This study                                    |
| <i>Miconia</i>               | Tropical  | Herbaceous | Field | non-woody | 2  | This study                                    |
| <i>Musa</i>                  | Tropical  | Herbaceous | Field | non-woody | 5  | This study                                    |
| <i>Oryza sativa</i>          | Tropical  | Grass      | Lab   | non-woody | 1  | Giuliani et al. 2019                          |
| <i>Phaseolus vulgaris</i>    | Temperate | Herbaceous | Lab   | non-woody | 2  | Gessler et al. 2017; Noguchi et al. 2001      |
| <i>Quercus humboldtii</i>    | Tropical  | Tree       | Field | woody     | 3  | This study                                    |
| <i>Spinacia oleracea</i>     | Temperate | Herbaceous | Lab   | non-woody | 4  | Noguchi & Terashima 1995, Noguchi et al. 1996 |
| <i>Tabebuia rosea</i>        | Tropical  | Tree       | Field | woody     | 1  | This study                                    |
| <i>Triticum aestivum</i>     | Temperate | Herbaceous | Lab   | non-woody | 7  | Averill & ap Rees 1994                        |

|                          |           |            |       |           |    |                                    |
|--------------------------|-----------|------------|-------|-----------|----|------------------------------------|
| <i>Triticum aestivum</i> | Temperate | Herbaceous | Lab   | non-woody | 10 | Averill & ap<br>Rees 1994          |
| <i>Triticum aestivum</i> | Temperate | Herbaceous | Lab   | non-woody | 1  | Azcon-<br>Bieto &<br>Osmon<br>1983 |
| <i>Triticum aestivum</i> | Temperate | Herbaceous | Lab   | non-woody | 5  | Azcon-<br>Bieto &<br>Osmon<br>1983 |
| <i>Unidentified</i>      | Tropical  | Herbaceous | Field | non-woody | 1  | This study                         |

121

122



123 **Supplementary Table 2.**

| Species                               | Number of replicates | Growth conditions | Source            | Inherent Q <sub>10</sub> | Apparent Q <sub>10</sub> | Temperature Control |
|---------------------------------------|----------------------|-------------------|-------------------|--------------------------|--------------------------|---------------------|
| <i>Acer pseudoplatanus</i>            | 1                    | Field             | This study        | 1.8                      | 3                        | 0.57                |
| <i>Betula pendula</i>                 | 6                    | Field             | This study        | 2                        | 6.5                      | 0.43                |
| <i>Eucalyptus pauciflora</i> (autumn) | 5                    | Field             | Bruhn et al. 2007 | 1.7                      | 4.2                      | (0.22)              |
| <i>Eucalyptus pauciflora</i> (spring) | 3                    | Field             | Bruhn et al. 2008 | 2                        | 2.8                      | (0.56)              |
| <i>Eucalyptus pauciflora</i> (summer) | 3                    | Field             | Bruhn et al. 2008 | 2                        | 2.7                      | (0.59)              |
| <i>Fagus sylvatica f. purpurea</i>    | 1                    | Field             | This study        | 2.6                      | 7.9                      | 0.32                |
| <i>Musa acuminata</i>                 | 5                    | Growth cabinet    | This study        | 1.5                      | 3.5                      | (0.20)              |
| <i>Platanus x hispanica</i>           | 4                    | Field             | This study        | 1.7                      | 3                        | 0.49                |
| <i>Pringlea antiscorbutica</i>        | 4                    | Field             | Bruhn et al. 2008 | 1.6                      | 2                        | (0.60)              |
| <i>Prunus padus</i>                   | 4                    | Field             | This study        | 2.4                      | 5                        | 0.65                |
| <i>Solanum lycopersicum</i>           | 5                    | Growth cabinet    | This study        | 2.1                      | 4.3                      | (0.33)              |
| <i>Tilia x europaea</i>               | 5                    | Field             | This study        | 1.9                      | 4.9                      | 0.41                |
| Mean                                  |                      |                   |                   | 1.94                     | 4.15                     | 0.48                |
| SD                                    |                      |                   |                   | 0.09                     | 0.5                      | 0.05                |

124

125 **Supplementary Table 2.** Values of temperature sensitivity (Q<sub>10</sub>) and temperature control (TC, see  
126 Fig. 2a-b) of nocturnal leaf respiration rate ( $\mu\text{mol CO}_2 \text{ m}^{-2} \text{ s}^{-1}$ ) in different species from this study and  
127 from all published literature. Calculations of TC followed the method explained in Figure 2. Values  
128 of TC in brackets are not included in the Mean  $\pm$  SD as they are alternatively calculated as Alternative  
129  $\text{TC} = (\text{Q}_{10,\text{inh}} - 1) / (\text{Q}_{10,\text{app}} - 1)$  because values of  $\alpha$  and  $\beta$  (*sensu* Fig. 2) were not available in published

130 studies. In calculations of the Alternative TC the value 1 is subtracted from the  $Q_{10}$ -values because 1  
131 represents the point where the respiration is not temperature-dependent. Thus, the Alternative TC is  
132 defined only below the temperature optimum of the respiration rate.

133 **Supplementary Table 3**

134

135 Additional 14 species used to evaluate Equation 4 (which is based on 31 species). S1-S4 are fully  
 136 explained in Supplementary Table 4.

| Species                            | Method                    | Method                  | Level       |
|------------------------------------|---------------------------|-------------------------|-------------|
|                                    | $Q_{10,inh} < Q_{10,app}$ | Temporal $R_T$ vs S1-S4 |             |
| <i>Acer pseudoplatanus</i>         | X                         |                         | Leaf        |
| <i>Betula pendula</i>              | X                         |                         | Leaf        |
| <i>Eucalyptus pauciflora</i>       | X                         |                         | Leaf        |
| <i>Fagus sylvatica f. purpurea</i> | X                         |                         | Leaf        |
| <i>Eucalyptus tereticornis</i>     |                           | X                       | Entire tree |
| <i>Musa acuminata</i>              | X                         |                         | Leaf        |
| <i>Plantago major</i>              |                           | X                       | Leaf        |
| <i>Platanus x hispanica</i>        | X                         |                         | Leaf        |
| <i>Pringlea antiscorbutica</i>     | X                         |                         | Leaf        |
| <i>Prunus padus</i>                | X                         |                         | Leaf        |
| <i>Prunus avium</i>                |                           | X                       | Leaf        |
| <i>Rumex obtusifolius</i>          |                           | X                       | Leaf        |
| <i>Solanum lycopersicum</i>        | X                         |                         | Leaf        |
| <i>Tilia x europaea</i>            | X                         |                         | Leaf        |

137

138

139

140 **Supplementary Table 4.**

141

142 Modelling protocol

| Simulation | Description                                                                                                                                                                                                                                                  | Equation                                                                                                                                                                                                                                                                                                                                                                                                                                                                                                                                                                                 |
|------------|--------------------------------------------------------------------------------------------------------------------------------------------------------------------------------------------------------------------------------------------------------------|------------------------------------------------------------------------------------------------------------------------------------------------------------------------------------------------------------------------------------------------------------------------------------------------------------------------------------------------------------------------------------------------------------------------------------------------------------------------------------------------------------------------------------------------------------------------------------------|
| S1         | <p>Standard</p> <p>Standard formula with <math>Q_{10}=2</math></p>                                                                                                                                                                                           | <p><math>R_T = R_{T_0} \times Q_{10}^{(T-T_0)/10}</math> with <math>Q_{10}=2</math>, <math>T_0=25^\circ\text{C}</math></p> <p>(Equation 1)</p> <p><math>R_{T_0}</math>, is leaf <math>R</math> at <math>25^\circ\text{C}</math> estimated for each plant functional type (PFT) as a fraction (parameter <math>f_d</math>) of <math>V_{\text{cmax}}</math> at <math>25^\circ\text{C}</math>. Values of <math>f_d</math>, <math>V_{\text{cmax}}</math> and <math>R_{T_0}</math> for the 9 PFTs used in Jules simulations included in this study are reported in Supplementary Table 5.</p> |
| S2         | <p>New formula</p> <p>Standard including variable nocturnal <math>R_{T_0}</math></p> <p>As above using upper confidence intervals from Equation 3 derived in Fig. 1a</p> <p>As above using lower confidence intervals from Equation 3 derived in Fig. 1a</p> | <p><math>R_{T,t} = R_{T,\text{sunset}} \times Q_{10}^{0.1 \times (T,t - T_{\text{sunset}})} \times (1 - 0.08 \times h^{0.58})</math></p> <p>(Equation 1 &amp; 3 = Equation 4)</p> <p><math>R_{T,t} = R_{T,\text{sunset}} \times Q_{10}^{0.1 \times (T,t - T_{\text{sunset}})} \times (1 - 0.0703 \times h^{0.562})</math></p> <p><math>R_{T,t} = R_{T,\text{sunset}} \times Q_{10}^{0.1 \times (T,t - T_{\text{sunset}})} \times (1 - 0.093 \times h^{0.521})</math></p>                                                                                                                 |

|    |                                                                                                          |                                                                                                                                                                                              |
|----|----------------------------------------------------------------------------------------------------------|----------------------------------------------------------------------------------------------------------------------------------------------------------------------------------------------|
|    |                                                                                                          | $R_{T,\text{sunset}}$ , corresponds to the value of leaf $R_T$ at sunset time under sunset Temperature ( $T_{\text{sunset}}$ ), estimated with Equation 1                                    |
| S3 | TDQ <sub>10</sub><br>Standard with temperature dependent Q <sub>10</sub> (TDQ <sub>10</sub> )            | $R_T = R_{T_0} \times Q_{10}^{(T-T_0)/10}$ with $Q_{10} = 3.09 - 0.0435 * T$<br>(Equation 1 & 2)                                                                                             |
| S4 | New formula & TDQ <sub>10</sub><br>Standard including variable nocturnal $R_{T_0}$ and TDQ <sub>10</sub> | $R_{T,t} = R_{T,\text{sunset}} \times Q_{10}^{0.1 \times (T,t - T_{\text{sunset}})} \times (1 - 0.08 \times h^{0.59})$<br>With $Q_{10} = 3.09 - 0.0435 * T$<br>(Equation 4 & 2 = Equation 5) |
|    | As above using upper confidence intervals from Equation 3 derived in Fig. 1a                             | $R_{T,t} = R_{T,\text{sunset}} \times Q_{10}^{0.1 \times (T,t - T_{\text{sunset}})} \times (1 - 0.0703 \times h^{0.562})$<br>With $Q_{10} = 3.09 - 0.0435 * T$                               |
|    | As above using lower confidence intervals from Equation 3 derived in Fig. 1a                             | $R_{T,t} = R_{T,\text{sunset}} \times Q_{10}^{0.1 \times (T,t - T_{\text{sunset}})} \times (1 - 0.093 \times h^{0.521})$<br>With $Q_{10} = 3.09 - 0.0435 * T$                                |

143

144

145

146

147

148

149

150 **Supplementary Table 5**

151  $R_{T_0}$  used in Jules simulations estimated as  $R_{T_0} = f_d \times V_{\text{cmax}}$  at 25°C used in Equations 1 & 2, reported  
 152 in Table 2 of reference 33.

| Plant functional type                  | $R_{T_0}$<br>[ $\mu\text{mol m}^2 \text{s}^{-1}$ ] | $f_d$ | $V_{\text{cmax}}$ at 25°C<br>[ $\mu\text{mol m}^2 \text{s}^{-1}$ ] |
|----------------------------------------|----------------------------------------------------|-------|--------------------------------------------------------------------|
| Tropical broadleaf<br>evergreen tree   | 0.41                                               | 0.01  | 41.16                                                              |
| Temperate broadleaf<br>evergreen tree  | 0.61                                               | 0.01  | 61.28                                                              |
| Temperate broad<br>leaf deciduous tree | 0.57                                               | 0.01  | 57.25                                                              |
| Needle leaf evergreen<br>tree          | 0.8                                                | 0.015 | 53.55                                                              |
| Needle leaf deciduous<br>tree          | 0.76                                               | 0.015 | 50.83                                                              |
| $C_3$ grass                            | 0.97                                               | 0.019 | 51.09                                                              |
| $C_4$ grass                            | 0.6                                                | 0.019 | 31.71                                                              |
| Evergreen shrub                        | 0.94                                               | 0.015 | 62.41                                                              |
| Deciduous shrub                        | 0.76                                               | 0.015 | 50.40                                                              |

153

154

155 **Supplementary Table 6**

156 Impact of incorporation of nocturnal variation in whole plant  $R_{T0}$  in simulated plant respiration  $R_p$   
 157 and  $NPP$  in simulations with standard  $Q_{10}=2$  and with  $TDQ_{10}$  using mean values, upper and lower  
 158 confidence intervals (CI) (See equations in Supplementary Table 4). Impact is estimated in percentage  
 159 as the difference between the temporal mean of simulations with and without nocturnal variation in  
 160 whole plant  $R_{T0}$  for  $NPP$  and vice versa for  $R_p$  divided by respective simulations without nocturnal  
 161 variation in  $R_{T0}$ . Calculations only include grid cells where grid level  $NPP$  is  $>50 \text{ g m}^{-2} \text{ yr}^{-1}$  in the  
 162 respective standard simulations to avoid excessively large % effects at very low  $NPP$ .

163

164

| Simulation                    | Global $NPP$ | Global $R_p$ | Tropical $NPP$ | Tropical $R_p$ |
|-------------------------------|--------------|--------------|----------------|----------------|
| Standard $Q_{10}$ mean values | 8.8          | 5.0          | 10.2           | 5.2            |
| Standard $Q_{10}$ upper CI    | 8.0          | 4.5          | 9.2            | 4.7            |
| Standard $Q_{10}$ lower CI    | 10.0         | 5.7          | 11.5           | 5.9            |
| $TDQ_{10}$ mean values        | 7.9          | 5.2          | 10.2           | 5.9            |
| $TDQ_{10}$ upper CI           | 7.2          | 4.8          | 9.4            | 5.4            |
| $TDQ_{10}$ lower CI           | 8.8          | 5.9          | 11.4           | 6.6            |

165

166

167 **Supplementary Table 7**

168 Explanation of symbols and acronyms regarding respiration and its temperature-sensitivity

| Acronym           | Explanation                                                                                  |
|-------------------|----------------------------------------------------------------------------------------------|
| $Q_{10}$          | T-sensitivity, is the relative change in $R$ obtained with a 10°C change in T                |
| $Q_{10,inh}$      | Inherent $Q_{10}$ : measured via short term (max 30 min) artificial T-changes                |
| $Q_{10,app}$      | Apparent $Q_{10}$ : measured via longer (hours) term natural changes in T in the environment |
| $R$               | Rate of respiration                                                                          |
| $R_T$             | $R$ at any given T                                                                           |
| $R_{T_0}$         | $R$ at set T, constant T                                                                     |
| $R_{T_0-initial}$ | Initial measurement of $R_{T_0}$                                                             |
| $R_{T,sunset}$    | Rate of respiration at sunset in terms of time and temperature (Equation 5)                  |
| $R_{T,t}$         | Rate of respiration at given timestep, t (Equations 4 & 5)                                   |
| T                 | Temperature                                                                                  |
| $T_0$             | Set temperature, constant temperature                                                        |
| $T,t$             | Leaf Temperature at a given timestep (Equations 4 & 5)                                       |
| $T_{sunset}$      | Temperature at sunset                                                                        |
| TC                | Degree to which T (via $Q_{10,inh}$ ) determines temporal variation in $R$                   |
| TD $Q_{10}$       | T-dependent $Q_{10}$                                                                         |

169

170



171 **Supplementary References**

- 172 1. Noguchi, K., Sonoike, K., Terashima, I. Acclimation of Respiratory Properties of Leaves of  
173 *Spinacia oleracea* L., a Sun Species, and of *Alocasia macrorrhiza* (L.) G. Don., a Shade  
174 Species, to Changes in Growth Irradiance. *Plant Cell Physiol.* **37**, 377-384 (1996).
- 175 2. Noguchi, K., Nakajima, N., Terashima, I. Acclimation of leaf respiratory properties in  
176 *Alocasia odora* following reciprocal transfers of plants between high- and low-light  
177 environments. *Plant Cell Environ.* **24**, 831–839 (2001).
- 178 3. Bunce, J.A. Direct and Acclimatory Responses of Dark Respiration and Translocation to  
179 Temperature. *Ann. Bot.* **100**, 67–73 (2007).
- 180 4. Trethewey, R. N., ap Rees, T. The role of the hexose transporter in the chloroplasts of  
181 *Arabidopsis thaliana* L. *Planta* **195**, 168-174 (1994).
- 182 5. Watanabe, C. K., Sato, S., Yanagisawa, S., Uesono, Y., Terashima, I., Noguchi, K. Effects  
183 of Elevated CO<sub>2</sub> on Levels of Primary Metabolites and Transcripts of Genes Encoding  
184 Respiratory Enzymes and Their Diurnal Patterns in *Arabidopsis thaliana*: Possible  
185 Relationships with Respiratory Rates. *Plant Cell Physiol.* **55**, 341–357 (2014).
- 186 6. McCutchan, C. L., Monson, R. K. Night-time respiration rate and leaf carbohydrate  
187 concentrations are not coupled in two alpine perennial species. *New Phytol.* **49**, 419–430  
188 (2001).
- 189 7. Leonardos, E. D., Micallef, B. J., Micallef, M. C., Grodzinski, B. Diel patterns of leaf C  
190 export and of main shoot growth for *Flaveria linearis* with altered leaf sucrose–starch  
191 partitioning. *J. Exp. Bot.* **57**, 801–814 (2006).
- 192 8. Lehmann, M. M., Wegener, F., Werner, R. A., Werner, C. Diel variations in carbon isotopic  
193 composition and concentration of organic acids and their impact on plant dark respiration in  
194 different species. *Plant Biol.* **18**, 776–784 (2016).

- 195 9. Farrar, S. C., Farrar, J. F. Carbon fluxes in leaf blades of Barley. *New Phytol.* **100**, 271-283  
196 (1985).
- 197 10. Baysdorfer, C., Sicher, R. C., Kremer, D. F. Relationship between Fructose 2,6-Bisphosphate  
198 and Carbohydrate Metabolism in Darkened Barley Primary Leaves. *Plant Physiol.* **84**, 766-  
199 769 (1987).
- 200 11. Giuliani, R., Karki, S., Covshoff, S., Lin, H., Coe, R., Koteyeva, N., Quick, W., Von  
201 Caemmerer, S., Furbank, R., Hibberd, J., Edwards, G. and Cousins, A. Knockdown of glycine  
202 decarboxylase complex alters photorespiratory carbon isotope fractionation in *Oryza sativa*  
203 leaves. *J. Exp. Bot.* **70**, 2773-278. (2019).
- 204 12. Averill, R. H., ap Rees, T. The control of respiration in wheat (*Triticum aestivum* L.) leaves.  
205 *Planta* **196**, 344-349 (1995).
- 206 13. Azcón-Bieto, J., Relationship between Photosynthesis and Respiration: The Effect of  
207 Carbohydrate Status on the Rate of CO<sub>2</sub> Production by Respiration in Darkened and  
208 Illuminated Wheat Leaves, *Plant Physiol.* **71**, 574-581 (1983).
- 209 14. Bruhn, D., Edgerton, J., Loveys, B. and Ball, M. Evergreen leaf respiration acclimates to  
210 long-term nocturnal warming under field conditions. *Glob. Change Biol.* **13**, 1216-1223  
211 (2007).

212
