# Supplementary material for: Nocturnal plant respiration is under strong non-temperature control
Source: PubMed Central journal article supplement (PMC9512894; doi:10.1038/s41467-022-33370-1), 2022-09-26
Supplement: 41467_2022_33370_MOESM2_ESM.pdf [file 41467_2022_33370_MOESM2_ESM.pdf]

## Description of Additional Supplementary Files

File Name: Supplementary Data 1

Description: Leaf  $R_{T_0}/R_{T_0,initial}$  values of leaves through night-time for all species in Figure 1a and Supplementary Figure 1.

File Name: Supplementary Data 2

Description: Replicate values of observed and modelled  $R_T/R_{T-initial}$  in nine field-grown broad leaf species in Figure 1b, 1c and Supplementary Figure 2 – Denmark

File Name: Supplementary Data 3

Description: Replicate values of observed and modelled  $R_T/R_{T-initial}$  in nine field-grown broad leaf species in Figure 1b and Supplementary Figure 2 – Exeter

File Name: Supplementary Data 4

Description: Data for conceptual figure of how  $R_T$  (rate of respiration at varying temperature) measured in response to either i) common short-term rapid artificial cooling (e.g. during 10-30 min) of leaf/plant can be used to calculate  $Q_{10,inh}$  (inherent temperature sensitivity of  $R$ , Equation 1, using point connected by the grey dashed line), or ii) natural cooling (over several hours) of the environment along temporal variation in  $T$  can be used to calculate  $Q_{10,app}$  (apparent temperature sensitivity of  $R$ ). Data of  $Q_{10,app}$ ,  $Q_{10,inh}$  and TC (temperature control) of  $R$  ( $\alpha/(\alpha+\beta)$ ) across ten species (46 replicate plants). Data of the dependence of  $Q_{10}$  and TC of  $R$  on rate of nocturnal cooling. Data of modelled nocturnal variations in  $R$  in response to  $T$  decrease during the night including and excluding effects of non-temperature control on metabolism. Figure 2.

File Name: Supplementary Data 5

Description: Data for evaluation of Equation 4 using tree stand (*Eucalyptus tereticornis*) level measured- and modelled (S1-S4, Supplementary Table 4) values of  $R_{T_0}/R_{T_0-initial}$ . **A)** Predicted  $R_{T_0}/R_{T_0-initial}$  as a function of measured  $R_{T_0}/R_{T_0-initial}$  (replicate chambers = 3, number of nights = 62, period = 8- 13 hours), Root Mean Square Error (RMSE) are also given. **B)** Standardised residuals of the four simulations (S1-S4, Supplementary Table 4) over time after sunset and over air temperature. The residuals appear more symmetrically distributed for the models that include the new term including time of night. **C)** Measured- and modelled (S1-S4, Supplementary Table 4) values of  $R_{T_0}/R_{T_0-initial}$  (replicate chambers = 3, number of nights = 62) plotted as function of time of night (means  $\pm$  1SD). **D)** Model evaluation with a Taylor Diagram showing the models that include  $TDQ_{10}$  and  $Q_{10} = 2$  and the new formula. Supplementary Figure 3.

File Name: Supplementary Software

Description: zip folder with the code (one python file for plotting figures, another which modifies a library, as explained in the readme). Data for Supplementary Figure 4 is included in this code.
